# Gender: a major determinant of brain response to nicotine

James H. Fallon<sup>1</sup>, David B. Keator<sup>2</sup>, James Mbogori<sup>3</sup>, Derek Taylor<sup>2</sup> and Steven G. Potkin<sup>3</sup>

<sup>1</sup> Department of Anatomy and Neurobiology, BIRN-RP, University of California, Irvine, CA, USA

<sup>2</sup> Department of Psychiatry and Human Behavior, BIRN-RP, University of California, Irvine, CA, USA

<sup>3</sup> Department of Psychiatry and Human Behavior, Brain Imaging Center, University of California, Irvine, CA, USA

## Abstract

Biological factors responsible for nicotine initiation and dependence are largely unknown. Men and women smoke differently, and may smoke for different reasons. Brain metabolic response to nicotine may explain gender differences in nicotine use. We used FDG-PET to measure brain metabolic response on placebo and following nicotine administered by patch in 42 females and 77 males (smokers and non-smokers) while performing a Continuous Performance Task (CPT) or the Bushman Competition and Retaliation Task (CRT). Nicotine administration affected brain metabolism much differently in males and females, and these differences were dependent on task and smoking history. In the placebo condition female smokers performing the CPT and female non-smokers performing the CRT consistently had higher brain metabolism than males, especially in the entire prefrontal system and the mid and anterior temporal lobe, language cortices, and related subcortical systems. The overall effect of nicotine was to decrease these gender differences in brain metabolism.

Received 10 February 2004; Reviewed 11 May 2004; Revised 6 July 2004; Accepted 7 July 2004

**Key words:** Brain imaging, gender, nicotine, PET, smoking.

## Introduction

Accumulating evidence shows that males and females may smoke at different rates and for different reasons. In general, females take fewer and shorter cigarette puffs, are less sensitive to some of nicotine's effects, are less successful with nicotine replacement therapy, and are more sensitive to smoking cues (CDC, 2003; Delfino et al., 2001; NIDA, 2000). We have been interested in the possibility of a gender difference in brain metabolic response to nicotine as a factor in understanding these gender differences. Since we have found a difference in metabolism in response to nicotine between smokers and non-smokers (Fallon et al., 2004), we also considered gender effects in smokers and non-smokers, both collectively and separately. The imaging tasks included a hostility/retaliatory task and an attentional/impulsivity task given the strong association of these personality characteristics with nicotine susceptibility (Barefoot et al., 1991; Fallon

et al., 2004; Gilbert and Gilbert, 1995; Golding and Mangan, 1982; Jamner et al., 1999; Jenks, 1992; Lipkus et al., 1994; Netter et al., 1998; Scherwitz et al., 1992; Whiteman et al., 1997; Williams, 1973; Zuckerman et al., 1990). Our hypotheses integrate these findings, proposing an interaction between gender, task, and nicotine.

## Methods

Using fluoro-deoxyglucose-position emission tomography (FDG-PET), we contrasted regional brain metabolic response to nicotine patch in smokers and non-smokers while the subjects performed a Continuous Performance Task (CPT) or the Bushman Competition and Retaliatory Task (CRT). Subjects were recruited by advertisement and screened for absence of personal or family major psychiatric illness and absence of medically significant, acute or chronic, illness requiring medication. Smoking history was obtained and subjects having smoked fewer than 10 cigarettes in their life and none in the previous 2 years were classified as non-smokers. Smokers smoked at least 10 cigarettes on a daily basis for at least 1 year and less than two packs per day. In total, 119 subjects

Address for correspondence: Dr S. G. Potkin, Department of Psychiatry and Human Behavior, Brain Imaging Center, University of California, Irvine, Irvine Hall, Room 163 Irvine, CA 92697-3960, USA.  
Tel.: 949-824-8040 Fax: 949-824-7873  
E-mail: sgpotkin@uci.edu

participated (77 males and 42 females). Sixty-four non-smokers completed all PET study procedures with both a placebo and 3.5-mg nicotine patch, and 55 smokers completed the procedures with a placebo, 3.5-mg nicotine patch, and 21-mg nicotine patch. (The 21-mg patch is approximately equivalent to half the plasma level obtained from smoking a standard cigarette.)

We chose a patch delivery of nicotine in non-smokers in order to remove the cueing and non-nicotine-related effects of smoking. Subjects' levels of brain metabolism with nicotine and placebo were compared in a double-blind, random assignment design. Nicotine (SmithKline Beecham, NicoDerm CQ) was administered at 3.5 or 21 mg, 3.5 h before injection of 5 mCi of FDG. Preliminary pilot testing in non-smokers demonstrated that some subjects, especially females, developed nausea and vomiting on 7 mg, and most subjects could discern which substance was given (nicotine vs. placebo). The low dose of 3.5 mg minimized both of these potential problems. During the FDG uptake, subjects performed a computer task that required sustained visual attention, response inhibition, and reaction time (CPT) or the Bushman CRT, which involved retaliatory responding by the subjects but not impulsivity-related behaviour (Baker et al., 1995; Bushman, 1995; Fallon et al., 2004). In the CPT, the subject views a series of blurred numbers presented a few seconds apart. Target numbers appear at intervals and the subject must remain vigilant to detect these targets with a button press (Nuechterlein et al., 1983). The Bushman task is used to provoke aggressive, retaliatory responding by participants. The subject competes with an 'opponent' in a reaction-time task in which the loser receives a blast of unpleasant noise. The object is to determine who can react more quickly to a red signal presented on a computer monitor. The person who presses his/her computer mouse key more slowly receives a burst of white noise while the subject depresses the mouse button delivered through headphones. The subject sets the level of static noise that he/she wants his/her 'opponent' to receive if the opponent's response is slower (a zero intensity level is included to provide a non-aggressive response alternative, and 10 is the most aggressive response. After the trial, the program displays the noise level that the subject's 'opponent' had set for him or her to receive for that trial. For the following trial, the subject can set the loudness and/or the duration of the sound blast to be delivered to the opponent.

Thirty PET slices at 6.5-mm intervals were obtained to cover the entire brain. Differences in regional FDG uptake were analysed by using statistical parametric

mapping software (SPM 99; Wellcome Department of Cognitive Neurology, University College, London, UK), with voxel values at a threshold of  $p < 0.025$  to correct for multiple comparisons, as described in detail by Fallon et al. (2004). The design matrix included as covariates global metabolic activity, age, handedness, plasma nicotine and cotinine concentrations (Jacob et al., 1981, 2000) to control statistically for the potential effects of these variables. Images were spatially normalized to the SPM standard brain template corresponding to the space defined by the Montreal Neurological Institute (MNI) brain atlas. Coordinates of significant activations were converted from MNI space to the space defined by Talairach and Tournoux to facilitate more widely used anatomical localization nomenclature using a nonlinear combination of two linear transformations (MRC, 2004). Coordinates above the anterior commissure were transformed using the following three linear equations:  $X' = 0.9900X$ ,  $Y' = 0.9688Y + 0.0460Z$ ,  $Z' = -0.0485Y + 0.9189Z$ . Coordinates below the anterior commissure were transformed by:  $X' = 0.9900X$ ,  $Y' = 0.9688Y + 0.0420Z$ ,  $Z' = -0.0485Y + 0.8390Z$ , different transformations were used above and below the AC/PC line because a single transform does not adequately account for the nonlinearity of the match between the Talairach and MNI brain in the dorsal vs. ventral aspects of the brain.

After the initial comparison of males and females on placebo, we separated smokers from non-smokers because of their differential experience with nicotine and our previous studies contrasting smokers and non-smokers (Fallon et al., 2004). Separate analyses were done for smokers and non-smokers for the CRT and CPT.

## Results

### Biochemical and behavioural results

There were no gender differences in plasma nicotine and cotinine levels or pre-scan CO measurements or Fagerstrom measures of nicotine dependence ( $p$ 's  $> 0.36$ ). During the CPT there were no significant differences between males and females on any performance measure (see Table 1). During the CRT males increased *intensity* of retaliation more than females ( $p < 0.05$ ), and females increased *duration* of retaliation more than males. In post-hoc subgroup analyses the difference between males and females was significant for non-smokers ( $p < 0.02$ ) but not for smokers ( $p < 0.30$ ). Controlling for performance measures did not change the overall PET imaging results.

**Table 1.** Comparisons between males and females on performance on the CPT (attentional/impulsivity task) and CRT (Bushman hostility/retaliatory task) during FDG uptake

| Task | Measure                    | Gender | Placebo mean | s.d.   | Main effect                       |
|------|----------------------------|--------|--------------|--------|-----------------------------------|
| CPT  | $D'$                       | M      | 1.54         | 0.77   | ns                                |
|      |                            | F      | 1.70         | 0.62   |                                   |
|      | Correct (240 targets)      | M      | 148.28       | 52.56  | ns                                |
|      |                            | F      | 155.50       | 59.98  |                                   |
|      | Incorrect (240 targets)    | M      | 91.72        | 52.56  | ns                                |
|      |                            | F      | 84.50        | 59.98  |                                   |
|      | False alarms (980 targets) | M      | 97.97        | 76.74  | ns                                |
|      |                            | F      | 84.73        | 47.71  |                                   |
| CRT  | Response bias              | M      | 0.41         | 0.55   | ns                                |
|      |                            | F      | 0.45         | 0.67   |                                   |
|      | Intensity (1–10)           | M      | 6.31         | 2.07   | $F(1, 134) = 6.1$ ,<br>$p < 0.02$ |
|      |                            | F      | 5.06         | 1.00   |                                   |
|      | Duration (ms)              | M      | 197.46       | 84.39  | $F(1, 134) = 7.4$ ,<br>$p < 0.01$ |
|      |                            | F      | 293.43       | 172.95 |                                   |
|      | Reaction time (ms)         | M      | 275.53       | 87.94  | ns                                |
|      |                            | F      | 289.25       | 124.44 |                                   |

### PET imaging results

Nicotine affected males and females much differently (see Figures 1–3 and Table 2). All of the metabolic differences between males and females reported herein involved higher glucose metabolic rates in females. Most of these differences were bilateral. Regardless of task, in the placebo conditions (Figure 1a, c) females consistently had higher brain metabolism, especially in the entire prefrontal system and the mid and anterior temporal lobe, language cortices, and related subcortical systems. Although nicotine administration affected metabolism in males and females differently, the overall effect of nicotine was to eliminate the differences between males and females in the CPT (Figure 1b), but to a lesser degree in the CRT, when non-smokers and smokers are combined (Figure 1d).

### CPT

In *non-smokers on the CPT* there were few differences in brain metabolism between males and females receiving the placebo patch (Figure 2a).

In *smokers on the CPT*, the differences in brain metabolism between males and females receiving the placebo patch were greatly exaggerated and included sectors of virtually all areas of the brain (Figure 2b and Table 2a). The metabolic increases in females were concentrated in the cortical and subcortical prefrontal

system, i.e. orbital cortex, dorsal prefrontal cortex (the superior and middle frontal gyri), DLPFC (the central two-thirds of the middle frontal gyrus, corresponding to Brodmann area 46), posterior medial thalamus, ventral caudate, nucleus accumbens, anterior cingulate occipital cortex (the latter four out of plane on the figure), and the receptive and premotor language areas. The differences in brain metabolism between male and female smokers were essentially eliminated by both the 3.5- and 21-mg nicotine patches in smokers (Figure 2d).

In summary, most of the differences in metabolism between males and females while performing the CPT were found in the smokers on placebo. With nicotine, these differences largely disappeared.

### CRT

A different pattern is observed with the CRT (Figure 3). In *non-smokers on the CRT*, brain metabolism in sectors of virtually all areas of the brain was higher in females while performing the CRT and receiving the placebo patch (Figure 3a and Table 2b). These gender differences in brain metabolism in non-smokers were virtually eliminated by the 3.5-mg nicotine patch (Figure 3c). In *smokers on the CRT*, there were very few differences between males and females when receiving placebo (Figure 3b); with nicotine, there were virtually no metabolic differences (Figure 3d). Post-hoc analyses confirmed that the

## CPT, females vs. males

(a) Placebo, all subjects

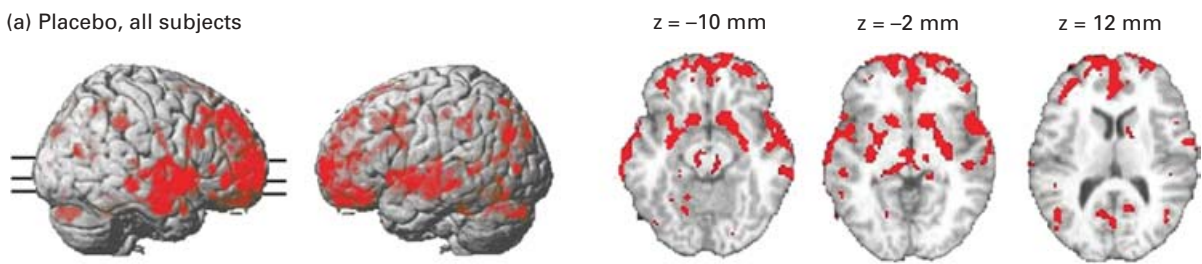

(b) Nicotine, all subjects

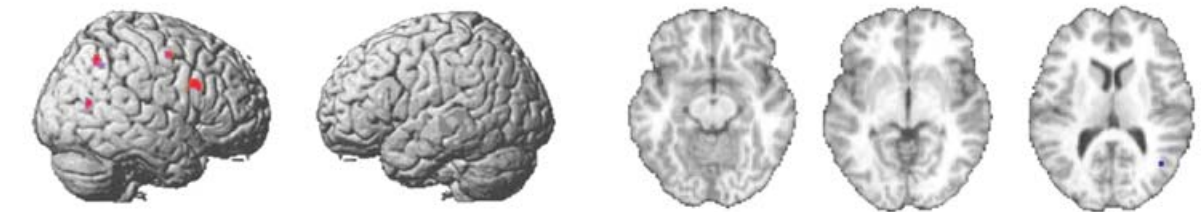

CRT (Bushman task), females vs. males

(c) Placebo, all subjects

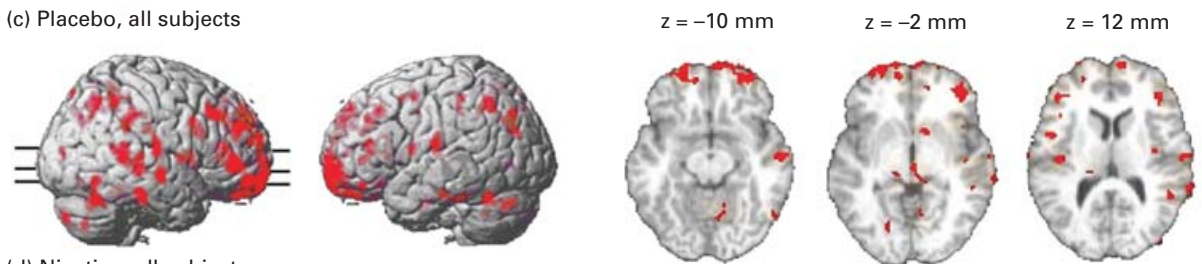

(d) Nicotine, all subjects

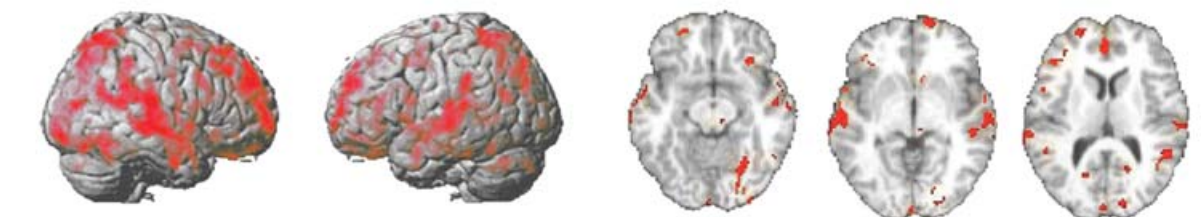

**Figure 1.** Rows (a)–(d) represent metabolic differences between males and females while performing the CPT (attentional task) [rows (a) and (b)] or the CRT (Bushman Competition and Retaliation Task) [rows (c) and (d)]. The first two columns represent the lateral cortical surfaces with three representative axial sections shown in the three figures on the right ( $z$  level  $-10$ ,  $-2$ ,  $+12$  mm, relative to the cantho-meatal plane, respectively indicated by the tic marks on the surface rendering). The left and right sides of the images correspond to the left and right sides of the brain. Red indicates the pixels that have significantly ( $p < 0.025$ ) increased metabolic rate in females relative to males on placebo [rows (a) and (c)] and on nicotine [rows (b) and (d)].

gender differences in response to nicotine is not a consequence of an effect or lack of effect in either gender but rather an interaction between gender, nicotine, and task.

### Discussion

Yoshii et al. (1988), but not Kawachi et al. (2002), observed higher brain metabolism in females at rest

(i.e. no task). Gender differences in brain function have been reported for memory, emotional memory, facial recognition, and visuospatial tasks (Cahill et al., 2001; Weiss et al., 2003), although no such differences have been reported for either the CPT or CRT. The gender differences in effects of nicotine on brain metabolism are largely unstudied, despite reported gender differences in nicotine use. Staley et al. (2001) found higher dopamine and serotonin transporter availability in



## CPT, females vs. males

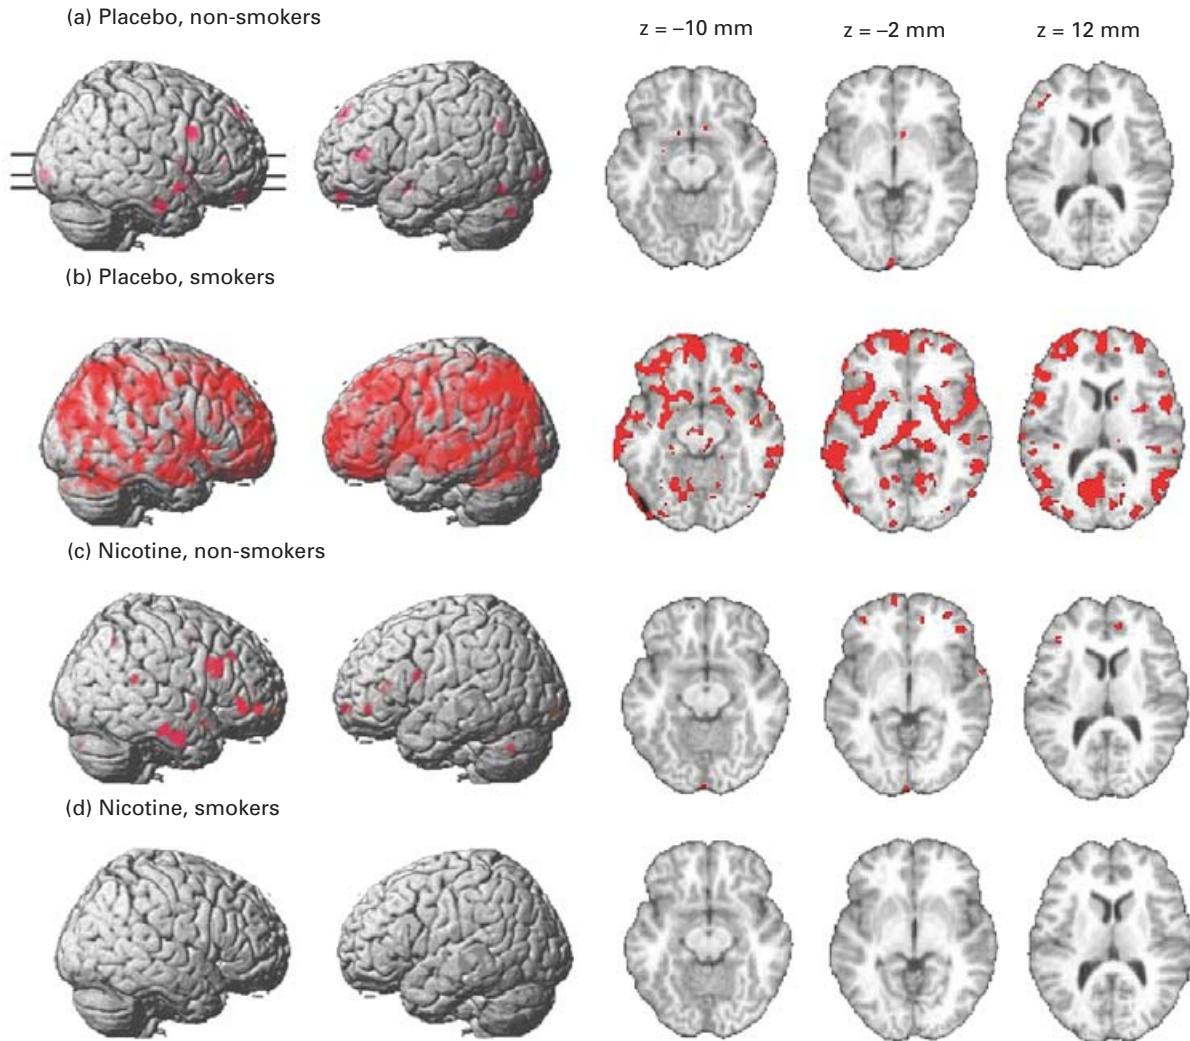

**Figure 2.** Rows (a)–(d) represent the metabolic differences between males and females while performing the CPT (attentional/impulsivity task). The columns represent the lateral cortical surfaces with three representative axial sections (z level  $-10$ ,  $-2$ ,  $+12$  mm, relative to the cantho-meatal plane respectively), indicated by the tic marks. The left and right sides of the images correspond to the left and right sides of the brain. Red indicates the pixels that have significantly ( $p < 0.025$ ) increased metabolic rate in females relative to males on placebo [row (a), non-smokers; row (b), smokers], on nicotine [row (c), non-smokers; row (d), smokers].

females and File et al. (2001) found that nicotine decreased negative mood ratings in females and increased them in males. Polymorphisms in the serotonin transporter gene have been linked to depression only in the presence of chronic stress, demonstrating an interaction between the serotonin transporter, mood, and environment (Caspi et al., 2003). Gender differences have also been reported for depression and hostility. Personality traits are also linked with nicotine dependence/susceptibility (Fallon et al., 2004).

We report higher brain metabolism in females during both the CPT and CRT. Nicotine eliminated the higher brain metabolism seen in females compared to males on placebo during the CPT (Figure 1b), but not the CRT (Figure 1d). Combining smokers and non-smokers, however, is inappropriate because we have shown that smoking history changes brain metabolic response to nicotine (Fallon et al., 2004). Therefore, once we considered the effects of gender separately in smokers and non-smokers, any gender differences

CRT (Bushman task), females vs. males

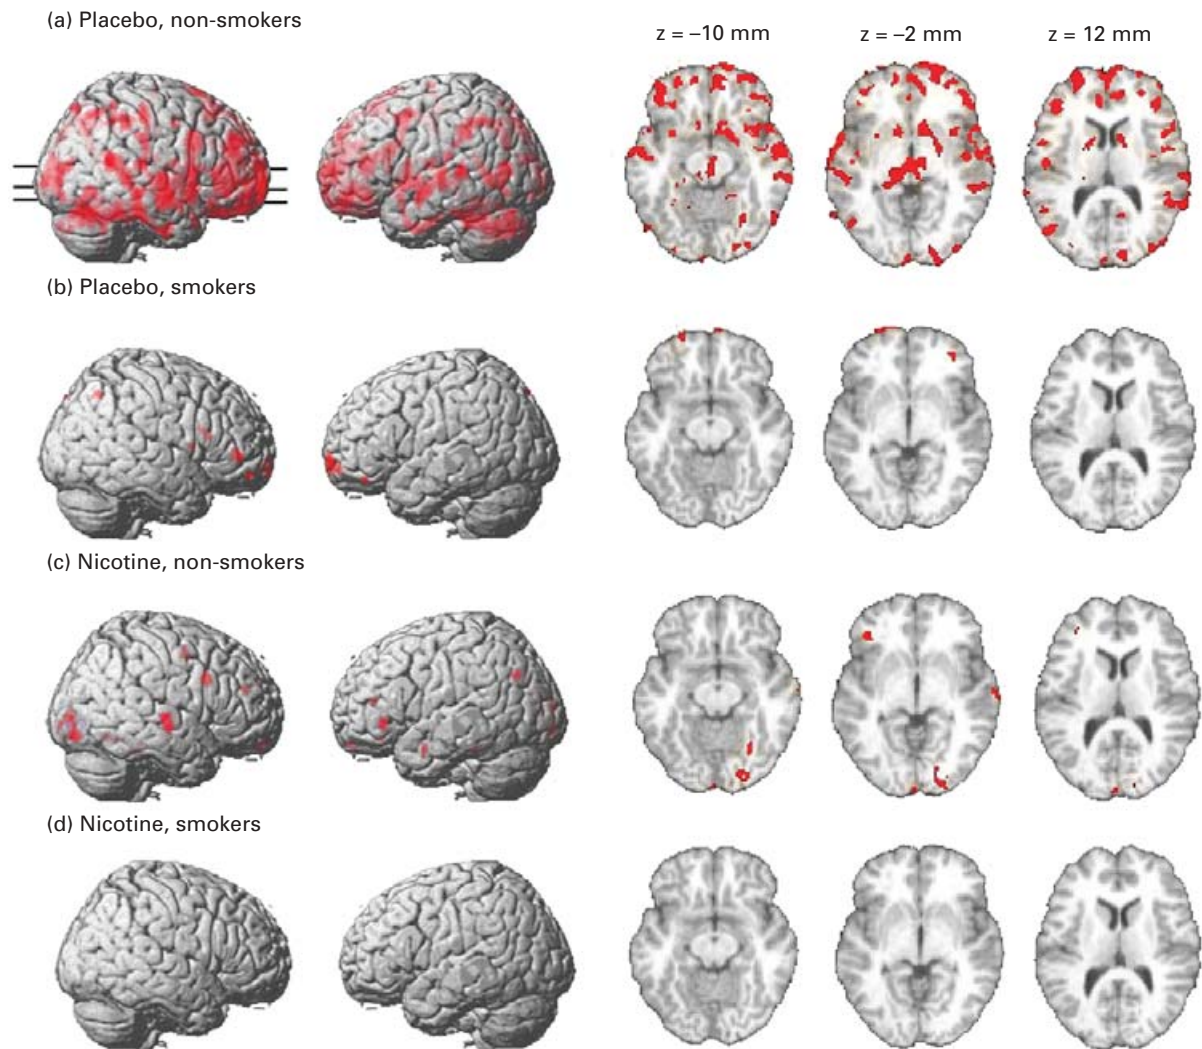

**Figure 3.** Rows (a)–(d) represent the metabolic differences between males and females while performing the Bushman CRT (hostility/retaliatory task). The columns represent the lateral cortical surfaces with three representative axial sections ( $z$  level  $-10$ ,  $-2$ ,  $+12$  mm, relative to the cantho-meatal plane respectively), indicated by the tic marks. The left and right sides of the images correspond to the left and right sides of the brain. Red indicates the pixels that have significantly ( $p < 0.025$ ) increased metabolic rate in females relative to males on placebo [row (a), non-smokers; row (b), smokers], on nicotine [row (c), non-smokers; row (d), smokers].

in either smokers or non-smokers that were observed on placebo, with the CPT or CRT, were eliminated or greatly reduced with nicotine. Specifically, with the CPT, higher metabolism was seen in female smokers relative to male smokers, which was eliminated by nicotine. With the CRT, higher metabolism was seen in female non-smokers relative to male non-smokers, which was eliminated by nicotine. The higher metabolism observed with placebo occurred primarily in the

prefrontal, temporal, and inferior parietal lobe systems, including those areas involving choice, attention, short-term memory, executive function, mood, and language. These differences were reversed by nicotine.

The results of the present study demonstrate the importance of considering gender in understanding the behavioural, physiological, and brain metabolic effects that are associated with nicotine susceptibility/dependence in addition to smoking history, and

**Table 2.** Comparisons between male and female smokers on placebo during a CPT (a), and male and female non-smokers on placebo during a CRT (b)

| Tailarach functional area specification         | Hemisphere | x   | y   | z   | Z score | t score |
|-------------------------------------------------|------------|-----|-----|-----|---------|---------|
| (a) CPT                                         |            |     |     |     |         |         |
| Temporal lobe, middle temporal gyrus            | Left       | -50 | -48 | 6   | 3.025   | 3.458   |
| Parietal lobe, precuneus                        | Left       | -14 | -66 | 40  | 2.999   | 3.42    |
| Limbic lobe, sub-gyral                          | Right      | 16  | -31 | -3  | 2.808   | 3.154   |
| Sub-lobar, thalamus, pulvinar                   | Right      | 18  | -31 | 7   | 2.659   | 2.954   |
| Superior temporal, gyrus, BA 22                 | Right      | 53  | 6   | 0   | 2.664   | 2.961   |
| Frontal lobe, precentral gyrus                  | Right      | 53  | 4   | 11  | 2.491   | 2.734   |
| Occipital lobe, inferior occipital gyrus, BA 18 | Left       | -26 | -86 | -13 | 2.587   | 2.858   |
| Occipital lobe, lingual gyrus                   | Left       | -26 | -80 | -6  | 2.236   | 2.413   |
| Anterior lobe, culmen                           | Right      | 20  | -49 | -14 | 2.517   | 2.768   |
| Posterior lobe, uvula                           | Right      | 16  | -87 | -24 | 2.457   | 2.691   |
| Limbic lobe, anterior cingulate, BA 10          | Right      | 14  | 50  | -1  | 2.427   | 2.652   |
| Frontal lobe, precentral gyrus, BA 6            | Right      | 50  | 2   | 46  | 2.333   | 2.534   |
| Frontal lobe, precentral gyrus                  | Right      | 32  | -10 | 63  | 2.318   | 2.516   |
| Temporal lobe, fusiform gyrus                   | Right      | 51  | -7  | -25 | 2.308   | 2.503   |
| Frontal lobe, sub-gyral                         | Right      | 46  | 22  | 17  | 2.293   | 2.484   |
| Frontal lobe, inferior frontal gyrus            | Right      | 50  | 30  | 10  | 2.09    | 2.235   |
| Frontal lobe, middle frontal gyrus              | Right      | 28  | 16  | 40  | 2.266   | 2.45    |
| Frontal lobe, middle frontal gyrus              | Right      | 32  | 4   | 46  | 2.195   | 2.363   |
| Temporal lobe, superior temporal gyrus, BA 22   | Right      | 67  | -9  | 6   | 2.193   | 2.361   |
| Frontal lobe, superior frontal gyrus, BA 6      | Left       | -26 | -3  | 63  | 2.18    | 2.345   |
| Frontal lobe, inferior frontal gyrus, BA 47     | Right      | 38  | 22  | -16 | 2.153   | 2.312   |
| Frontal lobe, inferior frontal gyrus, BA 47     | Right      | 32  | 19  | -8  | 2.114   | 2.264   |
| Insula, BA 13                                   | Right      | 32  | 21  | 1   | 2.072   | 2.213   |
| Temporal lobe, superior temporal gyrus          | Right      | 57  | -36 | 17  | 2.151   | 2.31    |
| Frontal lobe, middle frontal gyrus              | Right      | 48  | 38  | -9  | 2.111   | 2.26    |
| Cuneus, BA 17                                   | Left       | -10 | -95 | 5   | 2.108   | 2.257   |
| Occipital lobe, cuneus, BA 18                   | Left       | -2  | -91 | 6   | 2.074   | 2.216   |
| (b) CRT                                         |            |     |     |     |         |         |
| Frontal lobe, sub-gyral                         | Right      | 40  | 15  | 25  | 3.94    | 4.458   |
| Sub-lobar, caudate, caudate head                | Right      | 10  | 13  | -6  | 3.227   | 3.511   |
| Medial frontal gyrus                            | Right      | 16  | 47  | 0   | 3.58    | 3.967   |
| Frontal lobe, superior frontal gyrus, BA 11     | Right      | 18  | 63  | -13 | 3.024   | 3.258   |
| Frontal lobe, sub-gyral                         | Right      | 28  | 43  | 13  | 3.562   | 3.943   |
| Inferior frontal gyrus                          | Right      | 44  | 37  | 0   | 3.237   | 3.524   |
| Frontal lobe, inferior frontal gyrus            | Right      | 40  | 35  | 7   | 3.036   | 3.274   |
| Occipital lobe, cuneus, BA 18                   | Right      | 2   | -95 | 8   | 3.425   | 3.764   |
| Frontal lobe, inferior frontal gyrus            | Left       | -36 | 31  | 8   | 3.374   | 3.698   |
| Frontal lobe, sub-gyral                         | Left       | -38 | 19  | 21  | 2.974   | 3.197   |
| Frontal lobe, middle frontal gyrus              | Left       | -36 | 42  | -9  | 2.96    | 3.18    |
| Sub-lobar, caudate, caudate body                | Left       | -12 | -1  | 15  | 2.611   | 2.764   |
| Sub-lobar, caudate, caudate head                | Left       | -6  | 15  | -6  | 2.282   | 2.385   |
| Temporal lobe, superior temporal gyrus, BA 38   | Right      | 46  | 14  | -28 | 2.341   | 2.452   |
| Temporal lobe, superior temporal gyrus          | Right      | 48  | -48 | 19  | 3.21    | 3.489   |
| Temporal lobe, inferior temporal gyrus          | Right      | 57  | -26 | -21 | 3.149   | 3.413   |
| Temporal lobe, superior temporal gyrus          | Right      | 50  | -38 | 7   | 3.009   | 3.24    |
| Midbrain, brainstem, red nucleus                | Right      | 4   | -20 | -4  | 3.095   | 3.346   |
| Temporal lobe, middle temporal gyrus            | Left       | -44 | -66 | 11  | 3.159   | 3.425   |
| Occipital lobe, middle occipital gyrus          | Left       | -48 | -70 | -5  | 2.141   | 2.226   |
| Posterior lobe, declive                         | Right      | 42  | -73 | -18 | 3.088   | 3.337   |
| Temporal lobe, fusiform gyrus, BA 37            | Right      | 48  | -44 | -16 | 3.019   | 3.252   |
| Occipital lobe, lingual gyrus, BA 18            | Right      | 30  | -70 | -10 | 2.899   | 3.106   |

[continued overleaf]

Table 2 (cont.)

| Talairach functional area specification       | Hemisphere | x   | y   | z   | Z score | t score |
|-----------------------------------------------|------------|-----|-----|-----|---------|---------|
| Superior temporal gyrus, BA 22                | Left       | -65 | -19 | 5   | 3.079   | 3.326   |
| Temporal lobe, inferior temporal gyrus        | Left       | -48 | -5  | -30 | 2.802   | 2.989   |
| Temporal lobe, superior temporal gyrus        | Left       | -50 | -37 | 7   | 2.698   | 2.866   |
| Parietal lobe, inferior parietal lobule       | Left       | -46 | -35 | 35  | 3.039   | 3.276   |
| Occipital lobe, fusiform gyrus, BA 37         | Left       | -28 | -47 | -9  | 3.029   | 3.265   |
| Posterior lobe, declive                       | Left       | -40 | -75 | -21 | 3.003   | 3.233   |
| Anterior lobe, culmen                         | Left       | -34 | -42 | -25 | 2.989   | 3.215   |
| Frontal lobe, middle frontal gyrus, BA 6      | Left       | -48 | 6   | 48  | 3.012   | 3.244   |
| Frontal lobe, inferior frontal gyrus, BA 45   | Left       | -55 | 20  | 19  | 2.613   | 2.766   |
| Frontal lobe, inferior frontal gyrus, BA 9    | Left       | -55 | 9   | 31  | 2.562   | 2.707   |
| Posterior lobe, uvula                         | Right      | 14  | -85 | -24 | 3.012   | 3.244   |
| Posterior lobe, tuber                         | Right      | 24  | -81 | -30 | 2.105   | 2.186   |
| Frontal lobe, superior frontal gyrus, BA 8    | Right      | 2   | 30  | 52  | 2.563   | 2.708   |
| Parietal lobe, precuneus                      | Left       | -12 | -72 | 46  | 2.55    | 2.693   |
| Occipital lobe, cuneus                        | Left       | -10 | -84 | 37  | 2.187   | 2.278   |
| Frontal lobe, medial frontal gyrus            | Left       | -10 | 48  | 18  | 2.931   | 3.145   |
| Frontal lobe, superior frontal gyrus          | Left       | -20 | 53  | 7   | 2.859   | 3.058   |
| Frontal lobe, superior frontal gyrus, BA 9    | Left       | -4  | 56  | 30  | 2.84    | 3.035   |
| Limbic lobe, cingulate gyrus, BA 24           | Right      | 4   | -14 | 34  | 2.901   | 3.108   |
| Frontal lobe, medial frontal gyrus            | Left       | -8  | -19 | 53  | 2.736   | 2.911   |
| Frontal lobe, paracentral lobule, BA 31       | Left       | -8  | -13 | 47  | 2.701   | 2.869   |
| Middle temporal gyrus, BA 21                  | Left       | -61 | -58 | 5   | 2.88    | 3.083   |
| Inferior temporal gyrus, BA 20                | Right      | 50  | -9  | -31 | 2.864   | 3.064   |
| Temporal lobe, fusiform gyrus, BA 20          | Right      | 48  | -21 | -26 | 2.454   | 2.582   |
| Parietal lobe, insula                         | Left       | -46 | -13 | 15  | 2.843   | 3.039   |
| Frontal lobe, middle frontal gyrus, BA 6      | Left       | -24 | -4  | 43  | 2.827   | 3.02    |
| Parietal lobe, sub-gyral                      | Left       | -30 | -64 | 31  | 2.775   | 2.958   |
| Parietal lobe, superior parietal lobule, BA 7 | Left       | -26 | -52 | 43  | 2.077   | 2.154   |
| Occipital lobe, cuneus                        | Left       | -24 | -79 | 19  | 2.774   | 2.956   |
| Frontal lobe, inferior frontal gyrus, BA 47   | Right      | 36  | 26  | -15 | 2.754   | 2.932   |
| Lingual gyrus                                 | Right      | 22  | -87 | 3   | 2.724   | 2.897   |
| Occipital lobe, middle occipital gyrus, BA 18 | Right      | 16  | -87 | 15  | 2.606   | 2.759   |
| Middle occipital gyrus, BA 18                 | Right      | 26  | -97 | 3   | 2.327   | 2.436   |
| Limbic lobe, cingulate gyrus                  | Left       | -10 | 10  | 40  | 2.706   | 2.876   |
| Parietal lobe, inferior parietal lobule       | Right      | 44  | -35 | 39  | 2.69    | 2.857   |
| Frontal lobe, inferior frontal gyrus          | Right      | 61  | 13  | 25  | 2.689   | 2.856   |
| Temporal lobe, superior temporal gyrus        | Left       | -46 | -50 | 12  | 2.649   | 2.808   |
| Parietal lobe, precuneus                      | Right      | 18  | -66 | 38  | 2.327   | 2.436   |
| Occipital lobe, precuneus, BA 31              | Right      | 16  | -59 | 27  | 2.26    | 2.36    |
| Frontal lobe, medial frontal gyrus, BA 6      | Right      | 10  | -21 | 49  | 2.548   | 2.69    |
| Posterior lobe, cerebellar tonsil             | Left       | -6  | -56 | -38 | 2.538   | 2.679   |
| Frontal lobe, medial frontal gyrus            | Left       | -10 | 52  | -8  | 2.505   | 2.64    |
| Parietal lobe, sub-gyral, BA 39               | Right      | 32  | -60 | 36  | 2.456   | 2.584   |
| Parietal lobe, superior parietal lobule, BA 7 | Right      | 34  | -64 | 46  | 2.044   | 2.118   |
| Sub-lobar, extra-nuclear                      | Left       | -28 | 7   | -10 | 2.453   | 2.58    |
| Posterior lobe, declive                       | Left       | -20 | -59 | -11 | 2.413   | 2.535   |
| Anterior lobe, culmen                         | Left       | -6  | -57 | -16 | 2.347   | 2.459   |
| Posterior lobe, declive                       | Left       | -22 | -67 | -15 | 2.216   | 2.311   |
| Frontal lobe, superior frontal gyrus          | Right      | 18  | 25  | 43  | 2.402   | 2.522   |
| Anterior lobe, culmen                         | Left       | -28 | -57 | -19 | 2.389   | 2.507   |
| Frontal lobe, middle frontal gyrus            | Right      | 57  | 2   | 40  | 2.365   | 2.48    |
| Frontal lobe, superior frontal gyrus          | Left       | -34 | 60  | -1  | 2.355   | 2.468   |
| Sub-lobar, insula                             | Right      | 46  | -13 | 17  | 2.345   | 2.457   |



Table 2 (cont.)

| Talairach functional area specification  | Hemisphere | x   | y   | z   | Z score | t score |
|------------------------------------------|------------|-----|-----|-----|---------|---------|
| Parietal lobe, inferior parietal lobule  | Right      | 36  | -42 | 54  | 2.342   | 2.454   |
| Frontal lobe, superior frontal gyrus     | Left       | -24 | 42  | 22  | 2.341   | 2.452   |
| Parietal lobe, precuneus                 | Right      | 2   | -46 | 50  | 2.325   | 2.434   |
| Posterior lobe, pyramis                  | Left       | -18 | -83 | -29 | 2.314   | 2.421   |
| Parietal lobe, precuneus, BA 7           | Left       | -8  | -61 | 58  | 2.293   | 2.397   |
| Frontal lobe, middle frontal gyrus, BA 8 | Right      | 40  | 28  | 47  | 2.286   | 2.39    |
| Limbic lobe, cingulate gyrus             | Right      | 12  | 2   | 44  | 2.256   | 2.356   |
| Posterior lobe, pyramis                  | Left       | -26 | -75 | -30 | 2.249   | 2.348   |
| Posterior lobe, declive                  | Left       | -24 | -75 | -21 | 2.141   | 2.227   |
| Occipital lobe, lingual gyrus            | Left       | -26 | -88 | -6  | 2.215   | 2.31    |
| Parietal lobe, sub-gyral                 | Left       | -30 | -46 | 43  | 2.14    | 2.225   |
| Sub-lobar, insula                        | Right      | 38  | -7  | 8   | 2.14    | 2.225   |
| Parietal lobe, inferior parietal lobule  | Left       | -65 | -33 | 31  | 2.107   | 2.188   |
| Frontal lobe, superior frontal gyrus     | Right      | 12  | 52  | 25  | 2.052   | 2.127   |

The table presents Talairach functional area specification (Research Imaging Center, 2004) and coordinates, along with Z and t score statistics, for the maximum voxel score for each significant cluster. These areas can be directly compared to the PET images in Figure 2b (CPT) and Figure 3a (CRT). The values in the table indicate the original level of significance ranging from  $p < 0.025$  ( $Z > 2.28$ ) and in addition, those values at the more stringent  $p < 0.01$  ( $Z > 2.58$ ),  $p < 0.002$  ( $Z > 3.09$ ),  $p < 0.001$  ( $Z > 3.28$ ). BA, Brodmann area.

personality traits present at birth. Additionally, it is likely that other genetic factors contribute to susceptibility to nicotine. These results suggest that male and female subjects are differentially susceptible to nicotine based on the rigors imposed by certain tasks, and by implication, certain environments and social situations with attentional and retaliatory demands. Our results may be relevant to understanding the gender differences in smoking behaviours in different environments.

### Acknowledgements

This work was supported by a grant from NIDA/NCI, Transdisciplinary Tobacco Research Use (TTURC) grant DA-13332, and by Public Health Service research grant M01 RR00827 from the National Center for Research Resources. The authors thank Edye London, Ph.D., UCLA, for her most helpful consultation on the TTURC project, Frances Leslie, Ph.D., Sandra Loughlin, Ph.D., Jean Gehricke, Ph.D., Larry Jamner, Ph.D., Carole Whalen, Ph.D., all of the UC Irvine TTURC, for their helpful comments on the design, analysis, and manuscript.

### Statement of Interest

None.

### References

- Baker DB, Taylor CJ, Leyva C (1995). Continuous performance tests: a comparison of modalities. *Journal of Clinical Psychology* 51, 548-551.
- Barefoot JC, Peterson BL, Dahlstrom WG, Siegler IC, Anderson NB, Williams Jr. RB (1991). Hostility patterns and health implications: correlates of Cook-Medley hostility scale scores in a national survey. *Health Psychology* 10, 18-24.
- Bushman BJ (1995). Moderating role of trait aggressiveness in the effects of violent media on aggression. *Journal of Personality and Social Psychology* 69, 950-960.
- Cahill L, Haier RJ, White NS, Fallon J, Kilpatrick L, Lawrence C, Potkin SG, Alkire MT (2001). Rapid communication: sex-related difference in amygdala activity during emotionally influenced memory storage. *Neurobiology of Learning and Memory* 75, 1-9.
- CDC Tobacco Information and Prevention Source (2003). Cigarette smoking among adults - United States, 2001. *MMWR Highlights*, vol. 52, no. 40.
- Caspi A, Sugden K, Moffitt TE, Taylor A, Craig IW, Harrington H, McClay J, Mill J, Martin J, Braithwaite A, Poulton R (2003). Influence of life stress on depression: medication by a polymorphism in the 5-HTT gene. *Science* 301, 291-293.
- Delfino RJ, Jamner LD, Whalen CK (2001). Temporal analysis of the relationship of smoking behavior and urges to mood states in men versus women. *Nicotine Tobacco Research* 3, 235-248.

- Fallon JH, Keator DB, Mbogori J, Turner J, Potkin SG (2004). Hostility differentiates the brain metabolic effects of nicotine. *Cognitive Brain Research* 18, 142–148.
- File SE, Fluck E, Leahy A (2001). Nicotine has calming effects on stress-induced mood changes in females, but enhances aggressive mood in males. *International Journal of Neuropsychopharmacology* 4, 371–376.
- Gilbert DG, Gilbert BO (1995). Personality, psychopathology, and nicotine response as mediators of the genetics of smoking. *Behavioral Genetics* 25, 133–147.
- Golding JF, Mangan GL (1982). Effects of cigarette smoking on measures of arousal, response suppression, and excitation/inhibition balance. *International Journal of Addiction* 17, 793–804.
- Jacob P, Wilson M, Benowitz NL (1981). Improved gas chromatographic method for the determination of nicotine and cotinine in biologic fluids. *Journal of Chromatography* 222, 61–70.
- Jacob P, Wu S, Yu L, Benowitz NL (2000). Simultaneous determination of mecamylamine, nicotine, and cotinine in plasma by gas chromatography-mass spectrometry. *Journal of Pharmaceutical and Biomedical Analysis* 23, 653–661.
- Jamner LD, Shapiro D, Jarvik ME (1999). Nicotine reduces the frequency of anger reports in smokers and nonsmokers with high but no low hostility: an ambulatory study. *Experimental and Clinical Psychopharmacology* 7, 454–463.
- Jenks RJ (1992). Attitudes, perceptions, and risk-taking behaviors of smokers, ex-smokers, and nonsmokers. *Journal of Social Psychology* 132, 569–575.
- Kawachi T, Ishii K, Sakamoto S, Matsui M, Mori T, Sasaki M (2002). Gender differences in cerebral glucose metabolism: a PET study. *Journal of the Neurological Sciences* 1–2, 79–83.
- Lipkus IM, Barefoot JC, Williams RB, Siegler IC (1994). Personality measures as predictors of smoking initiation and cessation in the UNC Alumni Heart Study. *Health Psychology* 13, 149–155.
- MRC (2004). The MNI brain and the Talairach atlas. MRC Cognition and Brain Sciences Unit (<http://www.mrc-cbu.cam.ac.uk/Imaging/mnispac.html>).
- National Institute on Drug Abuse (NIDA) (2000). Update on nicotine addiction and tobacco research. NIDA Notes, vol. 15, no. 5.
- Netter P, Hennig J, Huwe S, Olbrich R (1998). Personality related effects of nicotine, mode of application, and expectancies on performance, emotional states, and desire for smoking. *Psychopharmacology (Berlin)* 135, 52–62.
- Nuechterlein KH, Parasuraman R, Jiang Q (1983). Visual sustained attention: image degradation produces rapid sensitivity decrement over time. *Science* 220, 327–329.
- Research Imaging Center (2004). The Talairach Daemon (<http://ric.uthscsa.edu/projects/talairachdaemon.html>). University of Texas Health Science Center at San Antonio.
- Scherwitz LW, Perkins LL, Chesney MA, Hughes GH, Sidney S, Manolio TA (1992). Hostility and health behaviors in young adults: the CARDIA study. Coronary artery risk development in young adults study. *American Journal of Epidemiology* 136, 136–145.
- Staley JK, Krishnan-Sarin S, Zoghbi S, Tamagnan G, Fujita M, Seibyl JP, Maciejewski PK, O'Malley S, Innis RB (2001). Sex differences in [<sup>123</sup>I]beta-CIT SPECT measures of dopamine and serotonin transporter availability in healthy smokers and nonsmokers. *Synapse* 41, 275–284.
- Weiss E, Siedentopf CM, Hofer A, Deisenhammer EA, Hoptman MJ, Kremser C, Golaszewski S, Felber S, Fleischhacker WW, Delazer M (2003). Sex differences in brain activation pattern during a visuospatial cognitive task: a functional magnetic resonance imaging study in health volunteers. *Neuroscience Letters* 344, 169–172.
- Whiteman MC, Fowkes FG, Deary IJ, Lee AJ (1997). Hostility, cigarette smoking and alcohol consumption in the general population. *Social Science and Medicine* 44, 1089–1096.
- Williams AF (1973). Personality and other characteristics associated with cigarette smoking among young teenagers. *Journal of Health and Social Behaviour* 14, 374–380.
- Yoshii F, Barker WW, Chang JY, Loewenstein D, Apicella A, Smith D, Boothe T, Ginsberg MD, Pascal S, Duara R (1988). Sensitivity of cerebral glucose metabolism to age, gender, brain volume, brain atrophy, and cerebrovascular risk factors. *Journal of Cerebral Blood Flow Metabolism* 8, 654–661.
- Zuckerman J, Ball S, Black J (1990). Influences of sensation seeking, gender, risk appraisal, and situational motivation on smoking. *Addictive Behaviors* 15, 209–220.
